# Supplementary material
Source: PubMed Central journal article supplement (PMC3352172)
Supplement: supp_157.9.2485_SuppFigs.pdf [file supp_157.9.2485_SuppFigs.pdf]

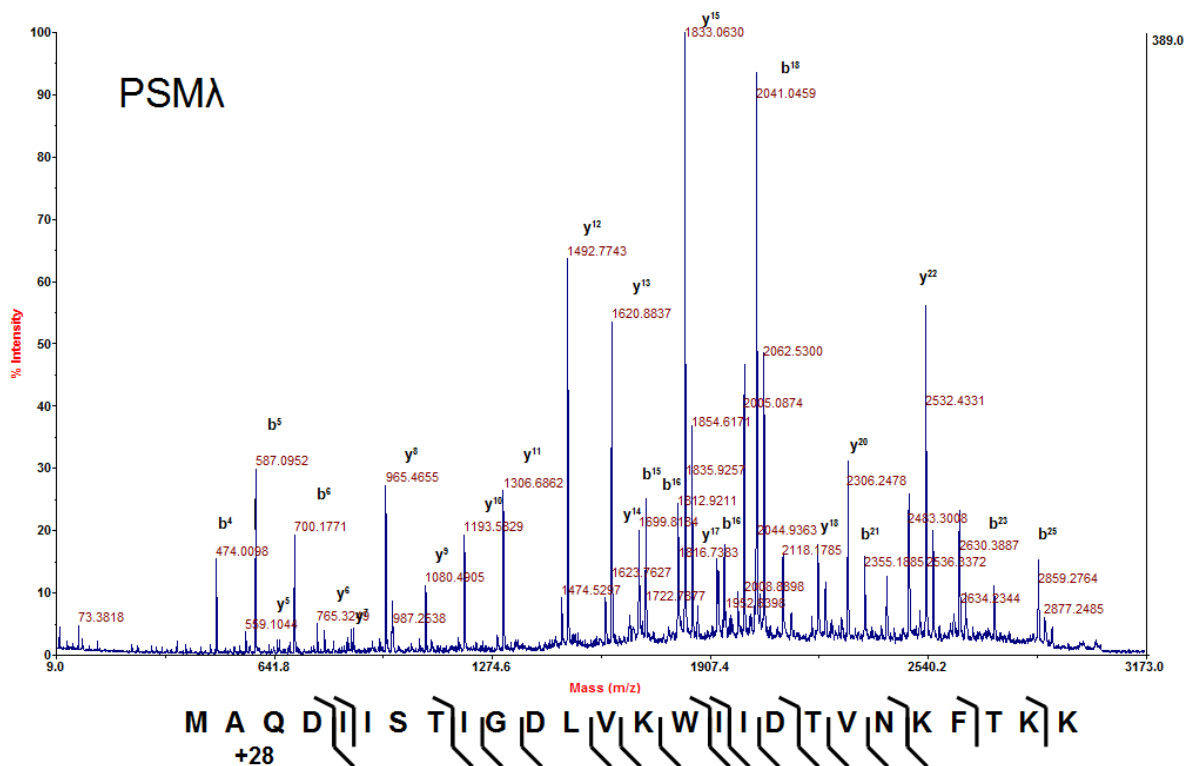

**Supplementary Fig. S1.** TOFTOF MS spectrum and annotation of delta-toxin (PSM $\alpha$ ),  $m/z$  3035, obtained from an *S. aureus* colony co-incubated with *B. subtilis*.

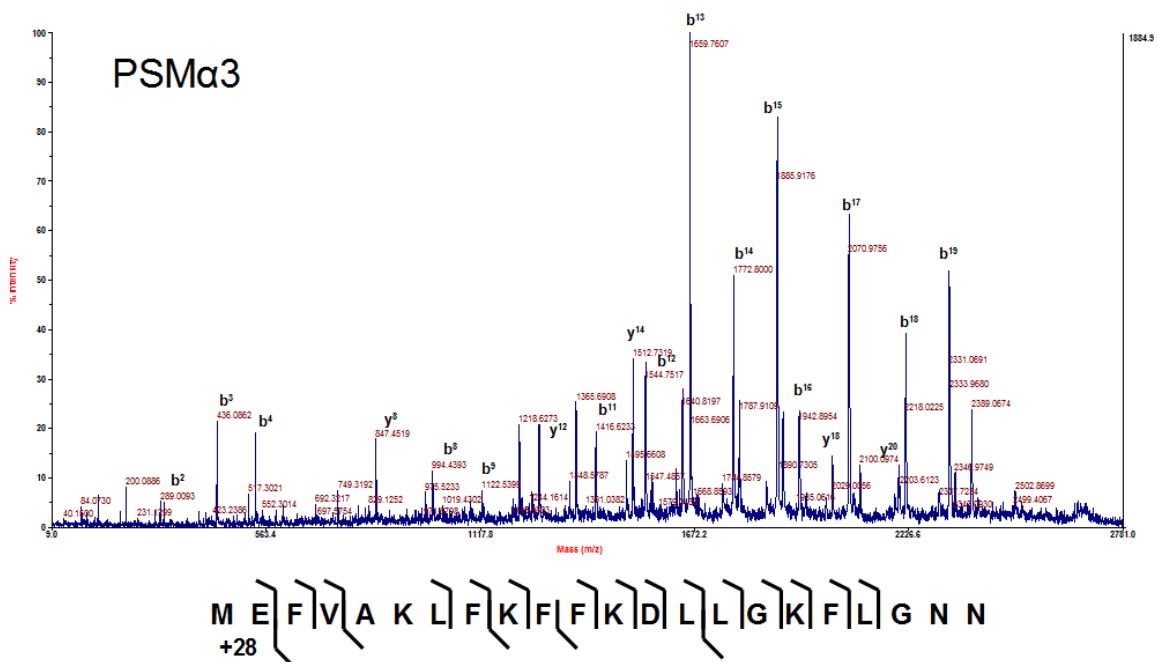

**Supplementary Fig. S2.** TOFTOF MS2 spectrum and annotation of PSM $\alpha$ 3,  $m/z$  2635, obtained from an *S. aureus* colony co-incubated with *B. subtilis*.

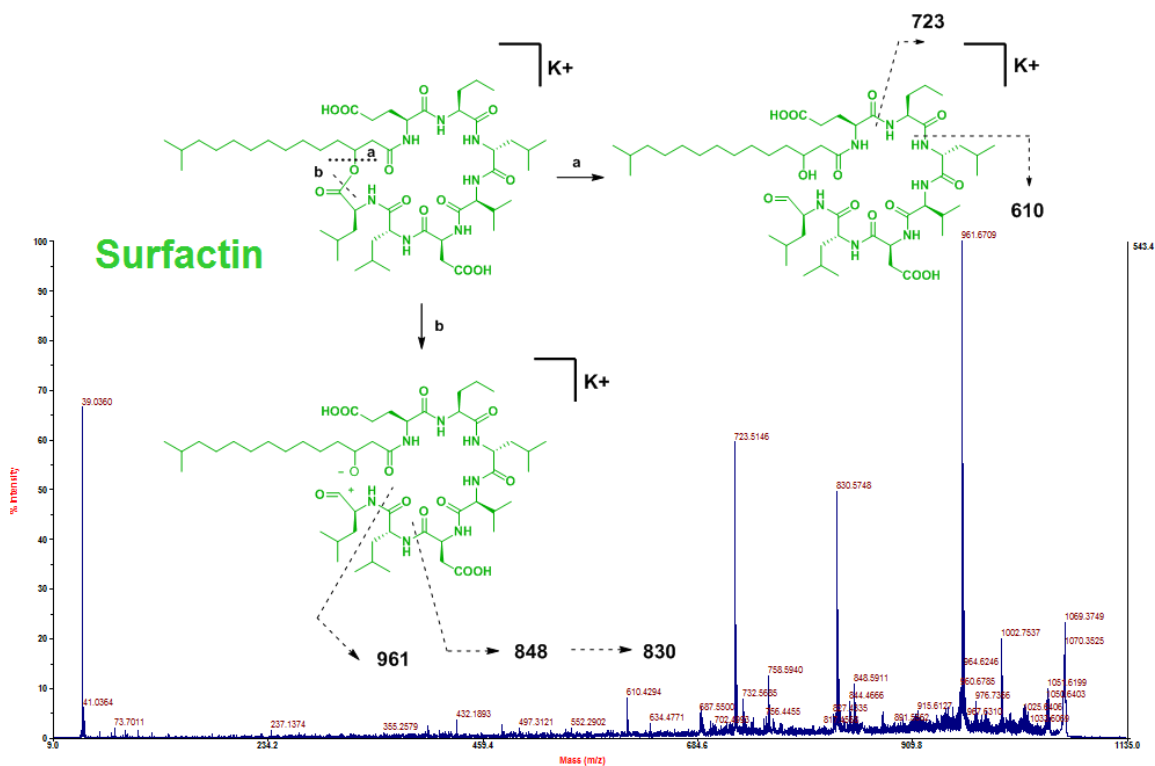

**Supplementary Fig. S3.** TOFTOF spectrum and fragmentation annotation of surfactin,  $m/z$  1075. The surfactin ion was visualized from a *B. subtilis* sample obtained from a colony grown adjacent to *S. aureus*.

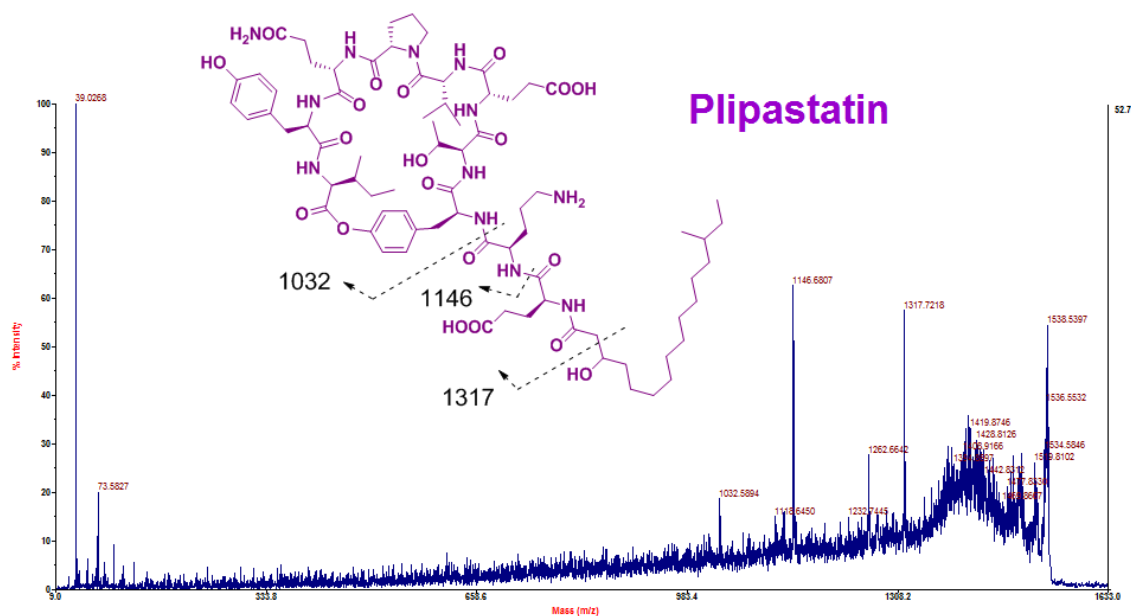

**Supplementary Fig. S4.** TOFTOF spectrum and fragmentation annotation of plipastatin,  $m/z$  1544. The plipastatin was visualized from a *B. subtilis* sample obtained from a colony grown adjacent to *S. aureus*.

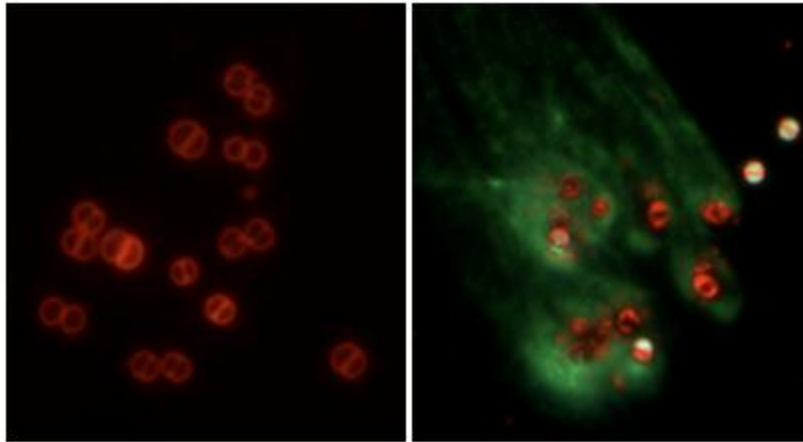

**Supplementary Fig. S5.** Fluorescence microscopy of *S. aureus* incubated with surfactin at 10 and 100  $\mu\text{g ml}^{-1}$ . The dye FM4-64 was used to visualize cell-membrane integrity and the dye SYTOX Green was used to stain nucleic acid, indicating membrane damage. (a) *S. aureus* incubated with surfactin at 10  $\mu\text{g ml}^{-1}$ , a concentration that does not lyse the bacterial wall. (b) *S. aureus* incubated with surfactin at 100  $\mu\text{g ml}^{-1}$ , a concentration that lyses the bacterial cell wall and exposes intracellular nucleic acid.
